# Supplementary material for: Novel insight into lepidopteran phylogenetics from the mitochondrial genome of the apple fruit moth of the family Argyresthiidae
Source: Research Square preprint supplement (doi:10.21203/rs.3.rs-3100647/v1), 2023-09-01
Supplement: Supplementary file 2 [file a42f90d5abafebf641e2111c.docx]

**Supplementary Information 1**

Figure S1. Maximum Likelihood phylogenetic tree based on 13 PCGs of 56 mitogenomes including outgroups species (*Phryganea cinerea, Phryganopsyche latipennis, Cheumatopsyche brevilineata, Limnephilus hyalinus,* and *Stenopsyche angustata*as).

Figure S2. Maximum Likelihood phylogenetic tree based on 13 PCGs + 2 rRNAs compared *A. conjugella* mitochondrial genome with the mitochondrial genomes of 507 Lepidoptera obtained from GenBank, representing 18 superfamilies and 42 families (Supplementary Table S1), including outgroups species (*Phryganea cinerea, Phryganopsyche latipennis, Cheumatopsyche brevilineata, Limnephilus hyalinus,* and *Stenopsyche angustata*as).
