# Supplementary material for: Novel insight into lepidopteran phylogenetics from the mitochondrial genome of the apple fruit moth of the family Argyresthiidae
Source: Research Square preprint supplement (doi:10.21203/rs.3.rs-3100647/v1), 2023-09-01
Supplement: Supplementary file 4 [file cf6268e06bbed480465004d8.docx]

**Supplementary Information 2**

Table S1. List of mitochondrial genomes of Lepidoptera (including *A. conjugella* mitochondrial genome) investigated in the study, representing 18 superfamilies and 42 families (Supplementary Figure S2), cluding outgroups species (*Phryganea cinerea, Phryganopsyche latipennis, Cheumatopsyche brevilineata, Limnephilus hyalinus,* and *Stenopsyche angustata*as).

Table S2. Results of two-tailed tests of substitution saturation for each codon position of the 13 PCGs. The following abbreviations were used: index of substitution saturation (ISS), critical value of ISS supposing symmetrical cladogenesis (ISS.CSym.), critical value of ISS supposing asymmetrical cladogenesis (ISS.CAsym.).
